# Supplementary material for: Host-microbiome protein-protein interactions capture disease-relevant pathways
Source: PubMed Central journal article supplement (PMC8895870; doi:10.1186/s13059-022-02643-9), 2022-03-04
Supplement: 13059_2022_2643_MOESM1_ESM.pdf [file 13059_2022_2643_MOESM1_ESM.pdf]

**Table S1. Examples of host-microbiome PPIs that have an experimentally verified role in human cellular physiology and/or disease.**

Included here are only those proteins with both an experimentally-verified host-microbiome protein-protein interaction and either a physiological effect on host cells or on a disease model that was attributable to the interaction. We excluded proteins found to promote adhesion without direct evidence of specific binding partners or a specific human cellular physiological change; and proteins with evidence of being only in pathogenic strains.

| <b>Bacterial protein (UniprotID) (species origin)</b>          | <b>Secretion System/ Transmembrane (TM)/ Cell wall (CW) annotation</b> | <b>Human protein</b>        | <b>Human protein localization (aggregated for all proteins listed)</b> | <b>Means by which the interaction was verified</b>                                                                   | <b>Evidence for role in disease</b>                                                                                                                                                                                                              | <b>Detection and Disease-association</b> |
|----------------------------------------------------------------|------------------------------------------------------------------------|-----------------------------|------------------------------------------------------------------------|----------------------------------------------------------------------------------------------------------------------|--------------------------------------------------------------------------------------------------------------------------------------------------------------------------------------------------------------------------------------------------|------------------------------------------|
| Amuc_1100 (B2UR41) ( <i>Akkermansia muciniphila</i> )          | TM                                                                     | Toll-like receptor 2 (TLR2) | Membrane                                                               | Biolayer interferometry<br>PMID: 32736072                                                                            | IL-1 $\beta$ , IL-6, IL-8, IL-10 and TNF- $\alpha$ production in PBMCs; increase in barrier function; PMID: 28249045<br>improve glucose tolerance and induce a lower body weight and fat mass gain in mice fed a high-fat diet<br>PMID: 27892954 | Disease-associated                       |
| Enolase (EnoA1) (Q88YH3) ( <i>Lactobacillus plantarum</i> LM3) | No annotation                                                          | Plasminogen                 | Membrane, Extracellular, Intracellular                                 | Bidimensional electrophoresis, plasminogen overlay assay, pull down using saturation binding<br>PMID: 23103380       | Enhancement of tissue-type plasminogen activator (tPA)-mediated conversion of plasminogen to plasmin<br>PMID: 23103380                                                                                                                           | Disease-associated                       |
| FadA (Q516B0) ( <i>Fusobacterium nucleatum</i> )               | Sec                                                                    | E-cadherin (Cadherin-1)     | Membrane, Extracellular, Intracellular                                 | Western blot and synthetic peptide based on E-cadherin binding domain that abrogates FadA binding.<br>PMID: 23954158 | Stimulates proliferation of human CRC cell lines (verified using complementation tests). Activates $\beta$ -catenin signaling pathways.<br>PMID: 23954158                                                                                        | Not disease-associated using this method |
| Faf (Q2TV77) ( <i>Finegoldia magna</i> )                       | Sec, TM, CW                                                            | Histones H4 and H2B         | Membrane, Extracellular, Intracellular                                 | Western blot, IP-MS<br>PMID: 24335013                                                                                | Binds histones and prevents antibacteriocidal activity.                                                                                                                                                                                          | Not detected                             |

|                                                                                                                                                                                                                                 |         |                                                                                                                                                                                                              |                                        |                                                                                                                                       |                                                                                                                                                                              |                                          |
|---------------------------------------------------------------------------------------------------------------------------------------------------------------------------------------------------------------------------------|---------|--------------------------------------------------------------------------------------------------------------------------------------------------------------------------------------------------------------|----------------------------------------|---------------------------------------------------------------------------------------------------------------------------------------|------------------------------------------------------------------------------------------------------------------------------------------------------------------------------|------------------------------------------|
|                                                                                                                                                                                                                                 |         |                                                                                                                                                                                                              |                                        |                                                                                                                                       | PMID: 24335013                                                                                                                                                               |                                          |
| Fap2<br>(A0A0X3Y2Y3)<br>( <i>Fusobacterium nucleatum</i> )                                                                                                                                                                      | Sec, TM | T cell immunoreceptor with Ig and ITIM domains (TIG IT)                                                                                                                                                      | Membrane                               | ELISA-based binding assays and Western blot analysis. Verified with truncation mutations.<br>PMID: 25680274                           | Inhibits natural killer (NK) and tumor infiltrating lymphocyte (TIL) cytotoxicity and hemagglutination of red blood cells. Verified by transposon mutants.<br>PMID: 25680274 | Not detected                             |
| FimH<br>(P08191)<br>(commensal <i>Escherichia coli</i> )                                                                                                                                                                        | Sec, TM | Pancreatic secretory granule membrane major glycoprotein GP2                                                                                                                                                 | Membrane, Extracellular, Intracellular | Binding confirmed with knockout<br>PMID: 19907495<br>Affinity mass spectrometry using derivatives of commensal K-12<br>PMID: 19627615 | Initiates mucosal immune response via M cells<br>PMID: 19907495                                                                                                              | Not disease-associated using this method |
| Flagellin (FliC)<br>(P06179)<br><i>Salmonella enterica</i><br>Note: Direct binding has only been demonstrated for <i>Salmonella typhimurium</i> , though flagellin from commensal Firmicutes stimulates TLR5.<br>PMID: 24237702 | T3SS    | Toll-like receptor 5 (TLR5)<br>PMID:14625549                                                                                                                                                                 | Membrane, Intracellular                | Co-immunoprecipitation, alanine scanning<br>PMID:14625549                                                                             | Induces MyD88-dependent signaling and activation of NF- $\kappa$ B.<br>PMID: 11323673<br>Gut microbiome involvement shown in TLR-/- mice<br>PMID: 24237702                   | Not detected                             |
| GeIE<br>(Q833V7)<br>( <i>Enterococcus faecalis</i> )                                                                                                                                                                            | Sec, TM | Glucagon like peptide 1 (GLP-1), gastric inhibitory polypeptide, glucagon, leptin, PPY, PYY. MCP-1, TNF- $\alpha$<br>PMID: 32051237;<br>mouse E-cadherin<br>PMID: 21699778;<br>C3 and iC3b<br>PMID: 18941224 | Membrane, Extracellular, Intracellular | Specificity for cleavage of GLP-1, confirmed by knock-out<br>PMID: 32051237                                                           | Barrier function measured by TEER (absent in knockout)<br>PMID: 32051237<br>Contributes to intestinal inflammation (confirmed with inhibitors)<br>PMID: 21699778             | Not disease-associated using this method |

|                                                                                             |                   |                                                                                                                             |                                        |                                                                                                                           |                                                                                                                                                                                                 |                                                 |
|---------------------------------------------------------------------------------------------|-------------------|-----------------------------------------------------------------------------------------------------------------------------|----------------------------------------|---------------------------------------------------------------------------------------------------------------------------|-------------------------------------------------------------------------------------------------------------------------------------------------------------------------------------------------|-------------------------------------------------|
| Microbial anti-inflammatory molecule (MAM) (C7H4X2) ( <i>Faecalibacterium prausnitzii</i> ) | No annotation     | ZO-1, DDX3X, ANXA2, FASN, FLNA, FLOT2, HSP90AB1, HSPA1B, JUP, KRT18, MYH9, PRDX1, PUF60, RACK1, RSL1D1, RPL14, RPL24, YWHAZ | Membrane, Extracellular, Intracellular | Affinity pull-down<br>PMID: 31503404                                                                                      | Improves barrier function <i>in vitro</i> and <i>in vivo</i> ; increases ZO-1 transcription; PMID: 31503404<br>Inhibits NF-KB signaling; PMID: 26045134                                         | 12/18 human interactors are disease-associated. |
| Mub (A0A0S2Z342) ( <i>Lactobacillus plantarum</i> )                                         | T3SS              | Cytokeratins (1, 4, 5, 6, 8, 9, 10), Hsp90, Laminin                                                                         | Membrane, Extracellular, Intracellular | Affinity purification followed by mass spectrometry<br>PMID: 30242281                                                     | Administration of the binding portion (Mubs5s6) results in pathogenic exclusion (decrease in the adhesion of enterotoxigenic <i>E. coli</i> ) to intestinal epithelial cells.<br>PMID: 30242281 | Not detected.                                   |
| p9 (Amuc_1631) (B2UM07) ( <i>Akkermansia muciniphila</i> )                                  | T3SS, Sec         | Intercellular adhesion molecule 2 (ICAM2)                                                                                   | Membrane                               | Ligand-receptor capture analysis with LC-MS<br>PMID: 33820962                                                             | Protein increases glucagon-like peptide-1 secretion and brown adipose tissue thermogenesis. Verified by IL-6 deficiency, which downregulates ICAM-2 expression.<br>PMID: 33820962               | Disease-associated                              |
| SlpA (P35829) ( <i>Lactobacillus acidophilus</i> NCFM)                                      | T4SS, Sec, TM, CW | CD209 antigen (DC-specific ICAM-3-grabbing nonintegrin (DC-SIGN))                                                           | Membrane, Extracellular, Intracellular | ELISA identified binding partners; confirmed with <i>SplA</i> knockout and with anti-DC-SIGN antibodies.<br>PMID:19047644 | Th2 polarization of dendritic cells and induction of IL-4 expression<br>PMID: 19047644                                                                                                          | Not detected                                    |
